# Supplementary material
Source: Atypon-hosted journal article supplement (https://archive.jpma.org.pk/PdfDownloadsupplements/749)

## Subject Index

**7th AKU Annual Surgical Conference,  
(Publication Committee), Page-S-1**

### A

#### **A Bibliometric Analysis Of The Studies**

A bibliometric analysis of the studies on dental implant failure, (Khan F R et al), Page-S-76

#### **Advancing Surgical Research**

In a digitally connected world through Likes, Hashtags and Followers — Advancing surgical research through a social media: A narrative review, (Saqib S U et al), Page-S-71

#### **Artificial Intelligence In Dentistry**

Artificial intelligence in dentistry, orthodontics and Orthognathic surgery: A literature review, (Siddiqui T A et al), Page-S-91

### B

#### **Barriers In Surgical Research**

Barriers in surgical research: A perspective from the developing world, (Siddiqui N A et al), Page-S-97

#### **Bonded Amalgam As A Fissure Sealant**

Bonded amalgam as a fissure sealant in low-income setting: A randomised controlled trial, (Khan F R et al), Page-S-3

### C

#### **Conceptual Framework For A Cardiac Surgery**

Conceptual framework for a cardiac surgery simulation laboratory and competency-based curriculum in Pakistan — a short

innovation report, (Noorali A A et al), Page-S-103

### D

#### **Diagnostic Accuracy Of Axillary Nodal Ultrasound**

Diagnostic accuracy of axillary nodal ultrasound after neoadjuvant chemotherapy in node-positive breast cancer patients: A validation study, Page, (Abidi S S et al), S-25

#### **Disparities In Access To Quality Surgical Care**

Disparities in access to quality surgical care for women in resource-constrained settings: Bottlenecks and the way forward, (Waqar U et al), Page-S-86

### E

#### **Exploring Our History**

Surgical research: Exploring our history — navigating the future, (Siddiqui N A et al), Page-S-2

### F

#### **Factors Affecting Specialty Choice Of Postgraduate Dental Residents**

Factors affecting specialty choice of postgraduate dental residents in Karachi, Pakistan, (Adnan S et al), Page, S-20

### I

#### **Innovations In Surgery**

Innovations in surgery between the past and future: A narrative review of targeted literature, (Hasan O et al), Page-S-55

### M

#### **Manual Loop In Laparoscopic Appendectomy**

Manual loop in laparoscopic appendectomy: A retrospective cohort study

(Ib)

and literature review, (Ramesh P et al), Page-S-10

**N**

### **Navigating Through Our History In Research**

Navigating through our history in research: An altmetric analysis for publications by the full-time operative dentistry faculty at the Aga Khan University Hospital in the past decade, (Naved N et al), Page, S-30

**O**

### **Oncoplastic Breast Surgery In Pakistan**

Current perspectives of oncoplastic breast surgery in Pakistan, (Vohra L M et al), Page-S-81

### **Otorhinolaryngology Consultations**

Otorhinolaryngology consultations in a multidisciplinary hospital — their effects on residents training on floor, (Unar A A et al), Page-S-44

**P**

### **Path To Publication**

Path to publication: A peer mentorship model for student-lead surgical research, (Waqar U et al), Page-S124

### **Perioperative Registries In Resource-Limited Settings**

Perioperative registries in resource-limited settings: The way forward for Pakistan, (Waqar U et al), Page-S-118

**R**

### **Radial Artery Coronary Bypass Grafting**

Radial artery coronary bypass grafting: Surgical outcomes of an unexplored innovation in a developing country, (Martins R S et al), Page-S-106

### **Radiographic Evaluation Of The Margins**

Radiographic evaluation of the margins of clinically acceptable metal-ceramic crowns, (Badar S B et al), Page - S-35

### **Rates Of Publication Of FCPS Dissertations**

Rates of publication of FCPS dissertations in international and national peer-review journals among residents at AKUH; A cross sectional review of 15 years, (Mughal A et al), Page – S-40

### **Role Of Simulation In Open Varicose Veins Surgery**

Role of simulation in open varicose veins surgery: A systematic review, (Pirzada M A et al), Page-S-49

**S**

### **Surgeons And Ethical Challenges**

Surgeons and ethical challenges in operating room, ((Nazim S M et al), Page-S-64

### **Surgical Training In Ophthalmology**

Surgical training in ophthalmology: Role of EyeSi in the era of simulation-based learning, (Momin S N A et al), Page-S-127

**T**

### **Temporary Epicardial Pacing Wires In Isolated Coronary artery bypass graft**

Temporary epicardial pacing wires in isolated Coronary artery bypass graft: Necessity or force of habit?, (Kamal M M et al), Page-S16

### **The Environment Under The Knife**

Narrative Review: The environment under the knife: A review of current Eco-surgical strategies and recommendations for

Pakistan, (Martins R S et al), Page-S-112

in Pakistan, (Waqar U et al), Page-S-130

**The First Trainee-Lead Model For Multicenter Surgical Research**

PakSurg: The first trainee-lead model for multicenter surgical research collaboration

**U**

**Understanding Deep Learning**

Understanding deep learning — challenges and prospects, (Adnan N et al), Page-S-59

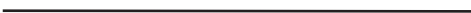

Supplement: 749 [file 749]
